# Supplementary material for: COP9 signalosome is an essential and druggable parasite target that regulates protein degradation
Source: PubMed Central journal article supplement (PMC7531848; doi:10.1371/journal.ppat.1008952), 2020-09-22
Supplement: ppat.1008952.s002.pdf [file ppat.1008952.s002.pdf]

A

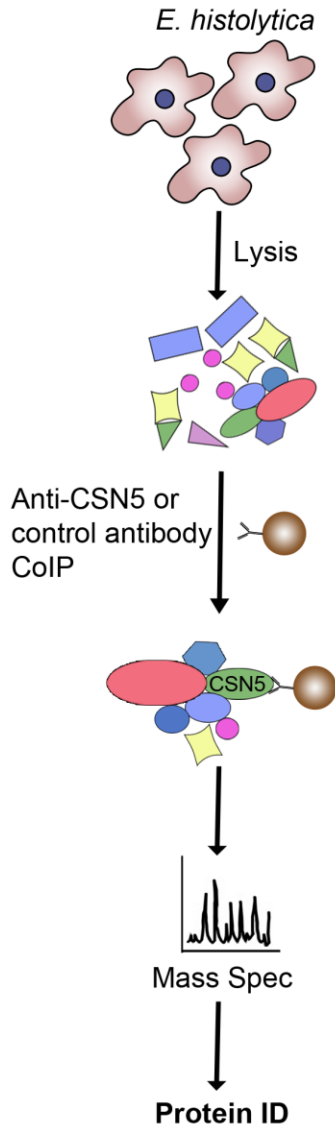

B

### CSN5

MGEEAAYKEWEKVNKVKYIEEDK**LLEW**NDSEREQIF**KDRPWKKDPYF**KKCYVSS  
**VALLK**MVMHAKQGEPLIMGILIGQTKGDSFVIDVVSLPVEGTETRVNASADCD  
 AYMLQYGEYKNSTGFKEPFCGWYHSHPSYK**CWLSG**IDVATEKLHQ SINDPWIAIV  
 VDPVTTSTNGKIEIGAFR**TFPEGF**KPQQKAEMKKVLPSEKIADFGSYYSYYSIK  
 VELFK**TKLDDQVLR**LLWHEYWINTLAATAIISSRDVMDEKIIDLYDKFTAELKNN  
**KSNVVDACGAILDDAKEIQMIYER**GIKSLDLKNILFNQKVTKG

### CSN2

MFDDDDIMFDDEGEVIDDEEIGIENKFYDAKNEMETNLEGAIESF**KEIVQEDSEK**  
 KTEWGYKSLRKLCRYYGKANNEEFKTYFVQFLEYLNI PAVSKAEKGLFLILGNI  
 NGMR**NEVVIEVNKA**IEICEKNSNFSRIIFKLN IKKANTMFESGKYEELKPFLSE  
 LVNSCYLPNGKEDPMRSHLLIELYGLEIQLYSKLNDMRKLQQLCGKINFSDRNIS  
 HPKVLGIIMECCGKVK**LCNSDFAGAK**NDFDFSFK**SLDEAGLPER**FDALRFTILAH  
 LLSSSK**IDIFQAQEVK**SYQRSPEMELVYQLYCAFNENNI IHFKEALNKSQSGQFKD  
 HPYIQQYIPLLIETAQKNLILKLVKCFKRINFSFLAQELDMKEEKVELLVL**RMIF**  
**DNTL**KAKINQFDR**YLIMTEEQSSVTRKYIAITSM**SKTLAASISV

### CSN3

MSSNDLSSVLDK**NQSTIFNEIKGLKFSPLTYERYNELLEK**YTI SNYPSSHLLIL  
 KEQTRTLNDKNLSKVISSIK**NYHENISPSMK**KSLEPVFLETLQSVRFQCRQCSL  
 LDKLTDLVHLLLSEVPDGVLSPYHALLAHILFAKKEYEHGKILYFTKYHKVQQPM  
 NSFTLQFLYYSGCIALYNRDLQEA YFLFDQCITTPSK**EITPQCVAAWK**KEALLC  
 LIINYSLYPVSKQFN YFIDLYQPLL VYK**QIQENFINGPEK**VKFIIEAFSSILK**QD**  
**GNLGLAKQVVVSYIYSGINK**VSK**AFNSISVEALAR**RIHYDKNLLRVGLNKLKKG  
 LINASFDGDIIVFEEVKVKDKGLVELLFQ**LK****ECEQIYEEMK**HHLTIREEEQMNKK  
 GSIN

### CSN1

MMNYYIQSYCKYGRIRYINLLSNGTIGSQELLEAIDYTELTKNIGGFARLKEAV  
 SSTLPLDEPEWKKK**IGYSLFEQVKALETEIQSTYGDEERAKLLYKLSDIHEEHGE**  
**YSKAIKNVLQAVESLKNKMMCAEGYR**LVRLNIFNENFHQATNFLNKLQSLDAFT  
 GNLYTKFINIISFLLAIRNTETFITAFELLDK**VTTFDEK**DNWEFGEFLSFQDIAI  
 YGTLIGLLTQ**KHQTNVIHLINNSK**FRNHADTVPELVILLDDYKQNKFSK**ICNDVQ**  
**QLEK**YFQFNLYFNQSINNVINCIKRKCYIEYIFAYSVDMMVMAMKMGDSLMTIE  
 SALEDYIYSDVIKAKIDAVTHTLNFVDGDER**YHAYESALNAVTKAINLSQEIVLK**  
 SDAMFDF

### CSN6

MTTPEVVLHPLALISITQSATHK**TINCGTNKPER**SVGILLGIENEEEIIVR**TSFE**  
**IPESQLITK**MSEGVK**LNSEVNKEYK**VVGWYAGMANGEPLASDIELHSQIVGENKN  
 GLFLILNISKYQKETDKIPITTFVLRNELFVPCSYHIASVDVERIGINEMINAG  
 SSVETDKK**EKEGISHA**IETLKKKVDILVKY**LKGVENGTIQADNHILAK**IAQICSS  
 IPVSDNSVFR**EEFNQES**NDAKLTVLMMLIHTTTVISNNIINYQDLKLYKNKLN  
 KEEERKKAERGMSFDIRRDGVMMAGLEEDYDSD
