# Supplementary material for: COP9 signalosome is an essential and druggable parasite target that regulates protein degradation
Source: PubMed Central journal article supplement (PMC7531848; doi:10.1371/journal.ppat.1008952), 2020-09-22
Supplement: ppat.1008952.s004.pdf [file ppat.1008952.s004.pdf]

Human **Cullin1** 711 IQAA I VRIM**K**MRKVLKHQQL 730  
*E. histolytica* **Cullin1** 676 IQAKQVRIM**K**QRRTMKYVDL 695

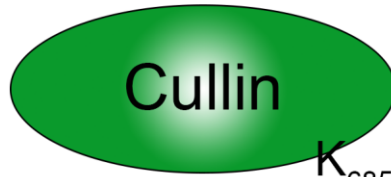

K<sub>685</sub>

NH

C=O

G<sub>76</sub>

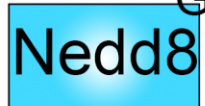

Human **Nedd8** 61 ILGGSVLHLVLALR**G** 76  
*E. histolytica* **Nedd8** 61 IQPGTQINILLALR**G** 76
