# Supplementary material for: COP9 signalosome is an essential and druggable parasite target that regulates protein degradation
Source: PubMed Central journal article supplement (PMC7531848; doi:10.1371/journal.ppat.1008952), 2020-09-22

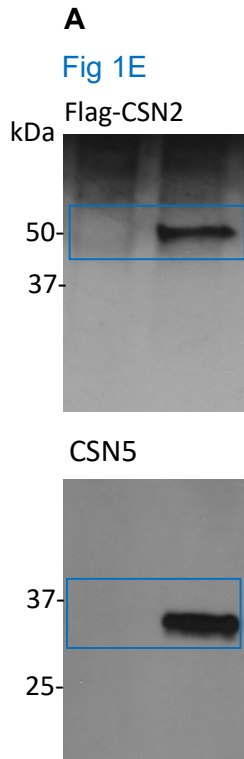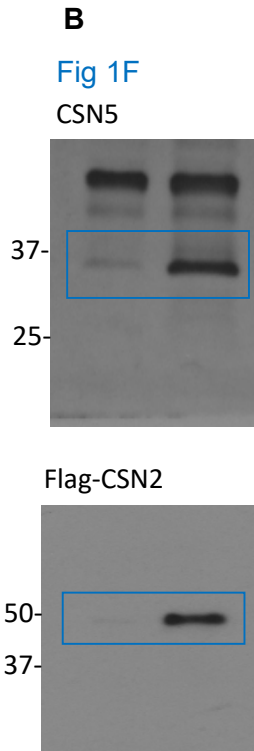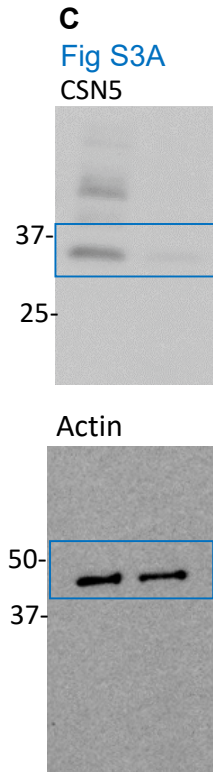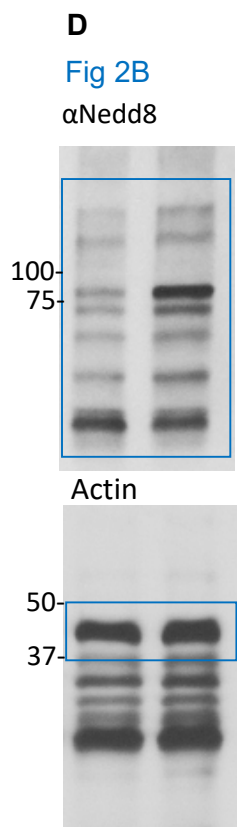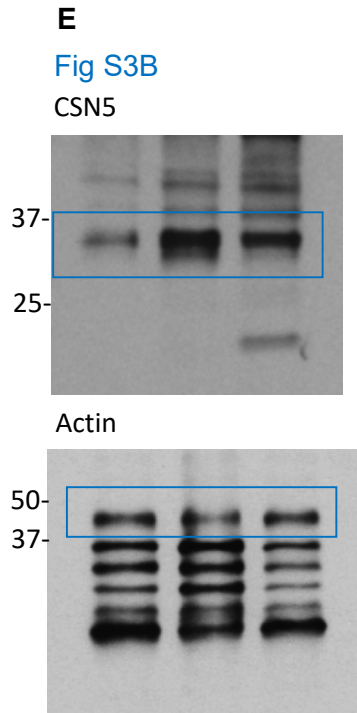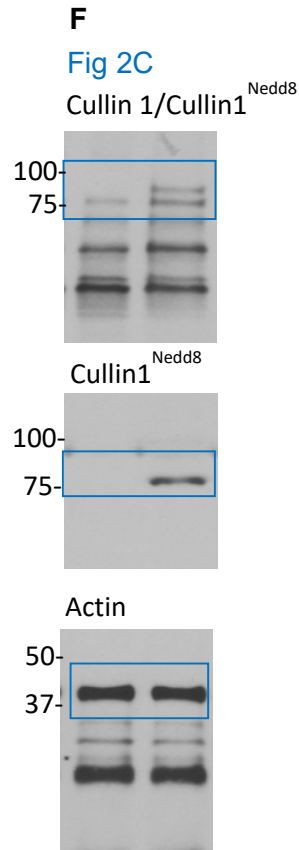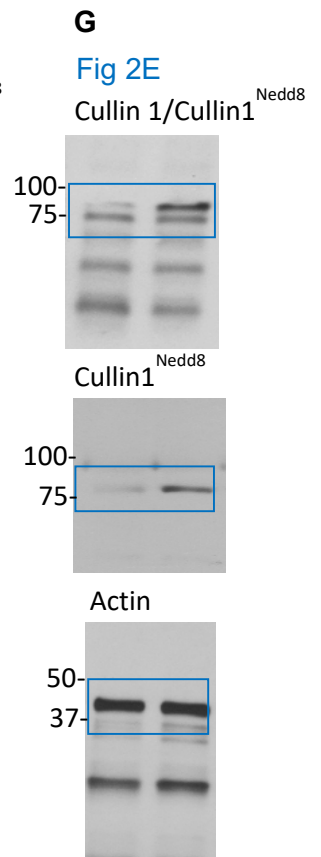

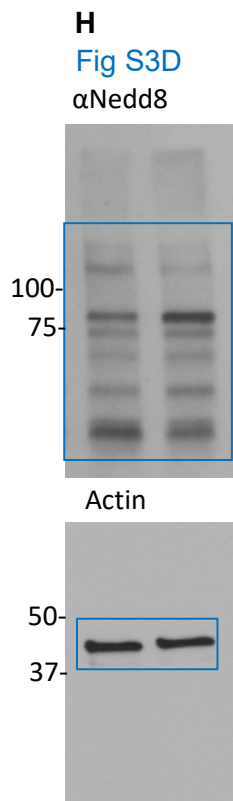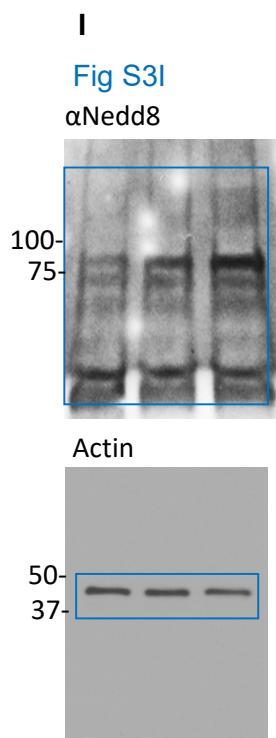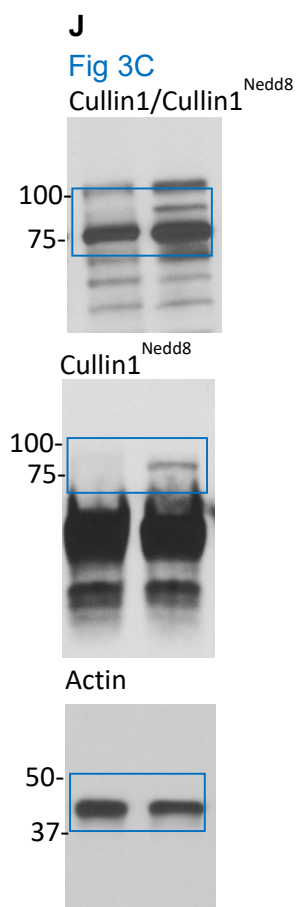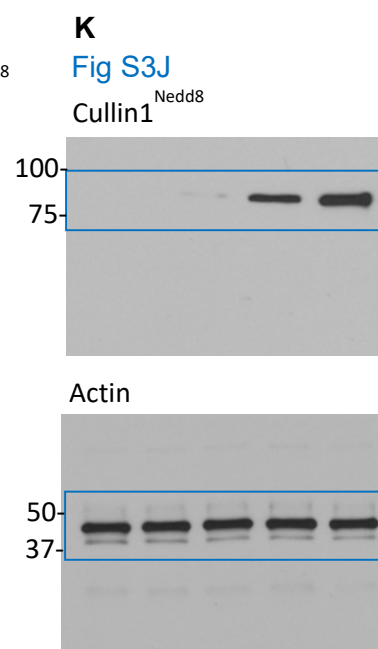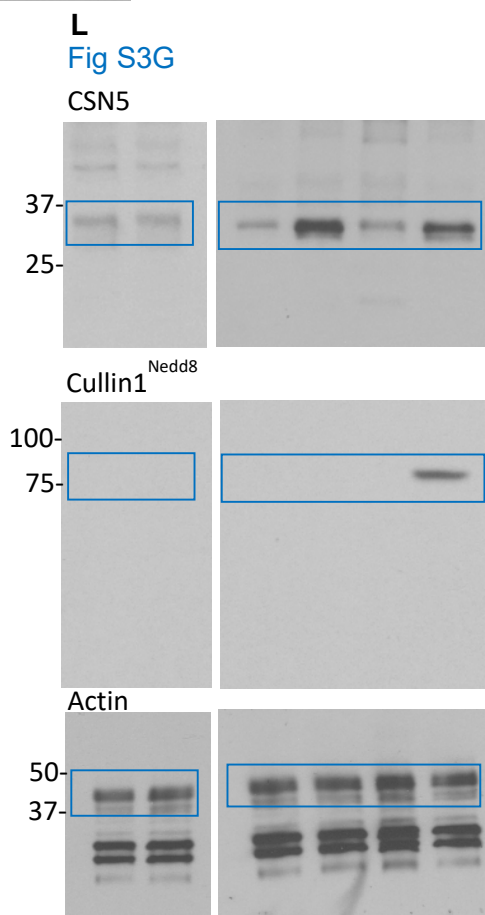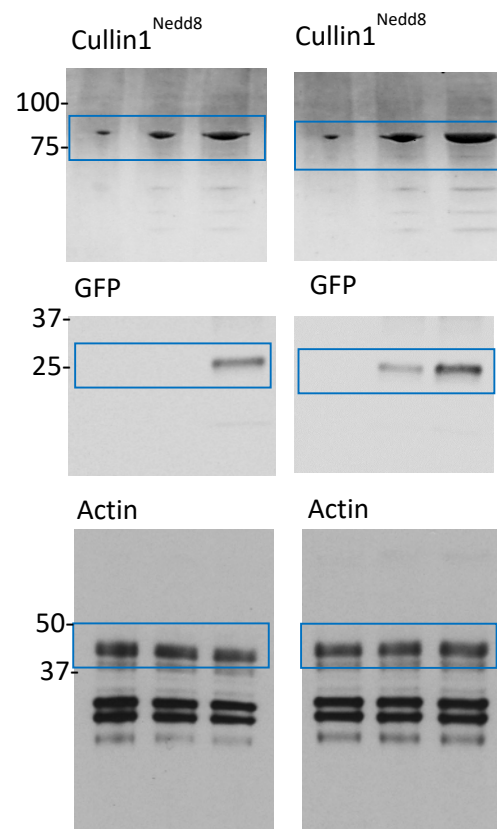

Supplement: ppat.1008952.s006.pdf [file ppat.1008952.s006.pdf]
