# Supplementary material for: COP9 signalosome is an essential and druggable parasite target that regulates protein degradation
Source: PubMed Central journal article supplement (PMC7531848; doi:10.1371/journal.ppat.1008952), 2020-09-22
Supplement: ppat.1008952.s008.pdf [file ppat.1008952.s008.pdf]

| <b>Compound</b>                                    | <b>PubChem ID</b> | <b>Compound</b> | <b>PubChem ID</b> |
|----------------------------------------------------|-------------------|-----------------|-------------------|
| 1zp5                                               | 5326979           | CHEMBL428767    | 4445394           |
| 8QT                                                | 3082386           | CHEMBL442445    | 9804305           |
| 20(R)-Ginsenoside Rh2                              | 54580480          | CHEMBL447211    | 44591823          |
| Actinonin                                          | 443600            | CHEMBL449228    | 25263244          |
| Alendronate, Na salt                               | 23681107          | CHEMBL450479    | 44563467          |
| AM-2                                               | 54687474          | CHEMBL450549    | 25263234          |
| 4-Aminobenzoyl-Gly-Pro-D-Leu-D-Ala hydroxamic acid | 16218906          | CHEMBL452947    | 44563494          |
| ARP 100                                            | 10044321          | CHEMBL469990    | 44591880          |
| ARP101                                             | 11292680          | CHEMBL470830    | 54726662          |
| Apratastat                                         | 11452716          | CHEMBL470831    | 54685358          |
| AZD1236                                            | 24751752          | CHEMBL473611    | 25064051          |
| Batimastat                                         | 24751752          | CHEMBL474456    | 25065318          |
| Capzimin                                           | 5362422           | CHEMBL474523    | 44563402          |
| CHEMBL196647                                       | 126599606         | CHEMBL474723    | 44563403          |
| CHEMBL197921                                       | 44402021          | CHEMBL474924    | 44563364          |
| CHEMBL200385                                       | 44405997          | CHEMBL474925    | 44563365          |
| CHEMBL251916                                       | 44405998          | CHEMBL475230    | 25065946          |
| CHEMBL251918                                       | 9913488           | CHEMBL475619    | 25263232          |
| CHEMBL252117                                       | 9936194           | CHEMBL482569    | 44591821          |
| CHEMBL254191                                       | 9892321           | CHEMBL482570    | 44591824          |
| CHEMBL254396                                       | 9949549           | CHEMBL482961    | 44561819          |
| CHEMBL254397                                       | 44445389          | CHEMBL482962    | 44591820          |
| CHEMBL254398                                       | 18379613          | CHEMBL488617    | 44563487          |
| CHEMBL254399                                       | 18379668          | CHEMBL492314    | 25263233          |
| CHEMBL254603                                       | 44445390          | CHEMBL492315    | 25263235          |
| CHEMBL254604                                       | 18379555          | CHEMBL492531    | 25066563          |
| CHEMBL254605                                       | 9865191           | CHEMBL492599    | 44563466          |
| CHEMBL254606                                       | 44445391          | CHEMBL492904    | 25263242          |
| CHEMBL254816                                       | 10971085          | CHEMBL492905    | 25263243          |
| CHEMBL254817                                       | 44445393          | CHEMBL492953    | 25263239          |
| CHEMBL254818                                       | 10001964          | CHEMBL493356    | 25067178          |
| CHEMBL255030                                       | 9866486           | CHEMBL493750    | 25066564          |
| CHEMBL262397                                       | 9888922           | CHEMBL493958    | 25263241          |
| CHEMBL362651                                       | 44402280          | CHEMBL494528    | 25066765          |
| CHEMBL398639                                       | 11261246          | CHEMBL494529    | 25263237          |
| CHEMBL398640                                       | 44445392          | CHEMBL496909    | 11602198          |
| CHEMBL398641                                       | 18379569          | CHEMBL496910    | 44592482          |
| CHEMBL400083                                       | 9869597           | CHEMBL498272    | 16726064          |
| CHEMBL400258                                       | 9936681           | CHEMBL498274    | 44592483          |
| CHEMBL400463                                       | 44445388          | CHEMBL499426    | 44563404          |
| CHEMBL41928                                        | 18379626          | CHEMBL502079    | 44563468          |
|                                                    | 44286483          | CHEMBL502674    | 44563493          |

| <b>Compound</b>                | <b>PubChem ID</b> | <b>Compound</b>                 | <b>PubChem ID</b> |
|--------------------------------|-------------------|---------------------------------|-------------------|
| CHEMBL508335                   | 25141117          | Marimastat                      | 119031            |
| CHEMBL509270                   | 44563491          | Metastat                        | 54678924          |
| CHEMBL510694                   | 44563490          | Minocycline                     | 54675783          |
| CHEMBL512856                   | 54726663          | MMP Inhibitor II                | 4218              |
| CHEMBL514336                   | 44563405          | MMP Inhibitor III               | 4219              |
| CHEMBL515439                   | 25263245          | MMP Inhibitor V                 | 9888141           |
| CHEMBL518974                   | 44591822          | MMP-2 Inhibitor I               | 6436367           |
| CHEMBL522422                   | 44563469          | MMP-2 Inhibitor II              | 221673413         |
| CHEMBL523001                   | 25067176          | MMP-2/MMP-3 Inhibitor I         | 16760550          |
| CHEMBL523035                   | 25263236          | MMP-2/MMP-3 Inhibitor II        | 3728863           |
| CHEMBL523201                   | 25066763          | MMP-2/MMP-9 Inhibitor I         | 4222              |
| CHEMBL523357                   | 25263238          | MMP-2/MMP-9 Inhibitor II        | 9822095           |
| CHEMBL523670                   | 25066566          | MMP-2/MMP-9 Inhibitor V         | 312659106         |
| CHEMBL523683                   | 25263240          | MMP-3 Inhibitor                 | 139211196         |
| CHEMBL523915                   | 44592481          | MMP-3 Inhibitor III             | 9887870           |
| CHEMBL523999                   | 44563465          | MMP-3 Inhibitor IV              | 3728864           |
| CHEMBL525733                   | 16726687          | MMP-3 Inhibitor V               | 4226              |
| CHEMBL609346                   | 44563492          | MMP-3 Inhibitor VIII            | 10549329          |
| Chlorhexidine, dihydrochloride | 9571016           | MMP-8 Inhibitor I               | 10761128          |
| CGS27023a                      | 9888897           | MMP-9 Inhibitor I               | 21310926          |
| cis-ACCP                       | 44457233          | MMP-9/MMP-13 Inhibitor I        | 9983251           |
| CL 82198 Hydrochloride         | 16760373          | MMP-9/MMP-13 Inhibitor II       | 4230              |
| Collagenase Inhibitor 1        | 11113112          | MMP-13 Inhibitor                | 5289110           |
| CP 471474                      | 9907286           | MMP408                          | 25066764          |
| CSN5i-3                        | 129892190         | N-Dansyl-D-phenylalanine        | 13734200          |
| Dimercaptopropanesulfonate     | 23676755          | NNGH                            | 448002            |
| Doxycycline HCl                | 54685920          | NSC 23766                       | 16759159          |
| Doxycycline Hyclate            | 5486183           | o-Phenanthroline<br>monohydrate | 21226             |
| Ecotin, Ecoli                  | 7979580           | PD166793                        | 9918908           |
| EGTA                           | 6207              | Penicillamine                   | 5852              |
| 4-epi-Chlortetracycline HCl    | 54710414          | Phosphoramidon                  | 445114            |
| 4-epi-demeclocycline           | 54731359          | Prinomastat                     | 466151            |
| Funalenone                     | 312243941         | Pro-Leu-Gly hydroxamate HCl     | 16219864          |
| GM 1489                        | 10322165          | Rebimastat                      | 9913881           |
| GM 6001                        | 132519            | Ro 31-4724                      | 5487313           |
| H18                            | 1266032           | Ro 32-3555                      | 9824350           |
| HJS30LG6HJ                     | 9824010           | RS-104966                       | 404615371         |
| HY-114418                      | 9956699           | S-3304                          | 10718956          |
| Ilomastat                      | 132519            | SB-3CT                          | 9883002           |
| Keracyanin chloride            | 29231             | Tanomastat                      | 6918336           |
| Lactobionic acid               | 7314              | TAPI-0                          | 21881944          |
| Luteolin                       | 5280445           |                                 |                   |

| <b>Compound</b>         | <b>PubChem ID</b> |
|-------------------------|-------------------|
| TAPI-1                  | 9827273           |
| TAPI2                   | 134693925         |
| Thiorphan               | 3132              |
| Trientine hydrochloride | 71433             |
| UK 356618               | 10370504          |
| UK 370106               | 9808181           |
| WAY033                  | 6852146           |
| WAY 170523              | 9830392           |
| ZINC00229666            | 761006            |
| ZINC02860431            | 2213585           |
| ZINC19438618            | 24695155          |
| ZINC19476737            | 19593101          |
| ZINC20231914            | *                 |
| ZINC22145620            | 16777008          |
| ZINC33510136            | *                 |
| ZINC37417840            | 43244918          |
| ZINC39475452            | *                 |
| ZINC40403881            | 25066149          |
| ZINC40897684            | 25065515          |
| ZINC40914527            | 25263230          |
| ZINC40914529            | 25263231          |
| ZINC40914758            | 25066153          |
| ZINC40914851            | 25065514          |
| ZINC41498653            | *                 |
| ZINC57989822            | 82160883          |
| ZINC62430943            | *                 |
| ZINC71632004            | 82307332          |
| ZINC71694581            | *                 |
| ZINC71726611            | *                 |
| ZINC76186843            | *                 |
| ZINC76441060            | *                 |
| ZINC82305218            | *                 |
| ZINC82401153            | *                 |
| ZINC82555302            | 82480989          |
| ZINC82867972            | *                 |
| ZINC82973537            | 82614354          |
| ZINC83306707            | *                 |
| Zinc ditiocarb          | 26633             |
| Zinc methacrylate       | 10130896          |

**S2 Table. Compounds used in screen.** Two hundred and five (205) metalloprotease inhibitors from multiple studies that all together screened millions of compounds\*. Two compounds dock onto *E. histolytica* CSN5, and formed hydrogen bonds with the metalloprotease site, zinc ditiocarb (ZnDTC) and CSN5i-3.

\*References

1. Benjamin, M.M. and R.A. Khalil, Matrix metalloproteinase inhibitors as investigative tools in the pathogenesis and management of vascular disease. *Exp Suppl*, 2012. 103: p. 209-79.
2. Abbenante, G. and D.P. Fairlie, Protease inhibitors in the clinic. *Medicinal Chemistry*, 2005. 1(1): p. 71-104.
3. Breuer, E., J. Frant, and R. Reich, Recent non-hydroxamate matrix metalloproteinase inhibitors. *Expert Opinion on Therapeutic Patents*, 2005. 15(3): p. 253-269.
4. Campestre, C., et al., N-Hydroxyurea as zinc binding group in matrix metalloproteinase inhibition: mode of binding in a complex with MMP-8. *Bioorg Med Chem Lett*, 2006. 16(1): p. 20-4.
5. Castro, M.M., et al., Matrix metalloproteinase inhibitor properties of tetracyclines: therapeutic potential in cardiovascular diseases. *Pharmacol Res*, 2011. 64(6): p. 551-60.
6. Catterall, J.B. and T.E. Cawston, Drugs in development: bisphosphonates and metalloproteinase inhibitors. *Arthritis Res Ther*, 2003. 5(1): p. 12-24.
7. Choi, J.Y. and R. Fuerst, Virtual High-Throughput Screening for Matrix Metalloproteinase Inhibitors. *Methods Mol Biol*, 2017. 1579: p. 259-271.
8. Hu, J., et al., Matrix metalloproteinase inhibitors as therapy for inflammatory and vascular diseases. *Nat Rev Drug Discov*, 2007. 6(6): p. 480-98.
9. [ncbi.nlm.nih.gov/pccompound/?term=chelating+agents](https://ncbi.nlm.nih.gov/pccompound/?term=chelating+agents)
10. Ledour, G., et al., Introduction of the 4-(4-bromophenyl)benzenesulfonyl group to hydrazide analogs of Ilomastat leads to potent gelatinase B (MMP-9) inhibitors with improved selectivity. *Bioorg Med Chem*, 2008. 16(18): p. 8745-59.
11. Li, W., et al., A selective matrix metalloprotease 12 inhibitor for potential treatment of chronic obstructive pulmonary disease (COPD): discovery of (S)-2-(8-(methoxycarbonylamino)dibenzo[b,d]furan-3-sulfonamido)-3-methylbutanoic acid (MMP408). *J Med Chem*, 2009. 52(7): p. 1799-802.
12. Li, K., F.R. Tay, and C.K.Y. Yiu, The past, present and future perspectives of matrix metalloproteinase inhibitors. *Pharmacol Ther*, 2020. 207: p. 107465.
13. Li, J., et al., Capzimin is a potent and specific inhibitor of proteasome isopeptidase Rpn11. *Nat Chem Biol*, 2017. 13(5): p. 486-493.
14. [scbt.com/browse/chemicals-Protein-Interacting-Inhibitors-Activators-Substrates-Protein-Inhibitors-MMP-Inhibitors/\\_/N-169lucc](https://scbt.com/browse/chemicals-Protein-Interacting-Inhibitors-Activators-Substrates-Protein-Inhibitors-MMP-Inhibitors/_/N-169lucc)
15. V, M., et al., Matrix metalloproteinase protein inhibitors: highlighting a new beginning for metalloproteinases in medicine. *Metalloproteinases In Medicine*, 2016. 2016(3): p. 31-47.
16. Raffetto, J.D. and R.A. Khalil, Matrix metalloproteinases and their inhibitors in vascular remodeling and vascular disease. *Biochem Pharmacol*, 2008. 75(2): p. 346-59.
17. Rossello, A., et al., A new development of matrix metalloproteinase inhibitors: twin hydroxamic acids as potent inhibitors of MMPs. *Bioorg Med Chem Lett*, 2005. 15(9): p. 2311-4.
18. Schlierf, A., et al., Targeted inhibition of the COP9 signalosome for treatment of cancer. *Nat Commun*, 2016. 7: p. 13166.
19. Sterling, T. and J.J. Irwin, ZINC 15--Ligand Discovery for Everyone. *J Chem Inf Model*,

2015. 55(11): p. 2324-37.

20. Vandenbroucke, R.E. and C. Libert, Is there new hope for therapeutic matrix metalloproteinase inhibition? *Nat Rev Drug Discov*, 2014. 13(12): p. 904-27.

21. Whitlock, G.A., et al., A novel series of highly selective inhibitors of MMP-3. *Bioorg Med Chem Lett*, 2007. 17(24): p. 6750-3.

22. Yan, Y.L., et al., Synthesis of hydroxypyrrone- and hydroxythiopyrrone-based matrix metalloproteinase inhibitors: developing a structure-activity relationship. *Bioorg Med Chem Lett*, 2009. 19(7): p. 1970-6.
